# Supplementary material for: Who Presents Where? A Population-Based Analysis of Socio-Demographic Inequalities in Head and Neck Cancer Patients’ Referral Routes
Source: MDPI journal article supplement (doi:10.3390/ijerph192416723), 2022-12-13
Supplement: s1 [file s1]

# **Supplementary Materials**

**Who Presents Where? A population-based analysis of the socio-demographic inequalities in head and neck cancer patients' referral routes**

Jennifer Deane, Ruth Norris, James O'Hara, Jo Patterson and Linda Sharp

**Supplementary Figure S1** Route to diagnosis categorisation by each analysis

**Supplementary Table S1:** Demographic and clinical characteristics of all individual HNC diagnosis routes during 2006-2014

Supplementary Figure S1 Route to diagnosis categorisation by each analysis

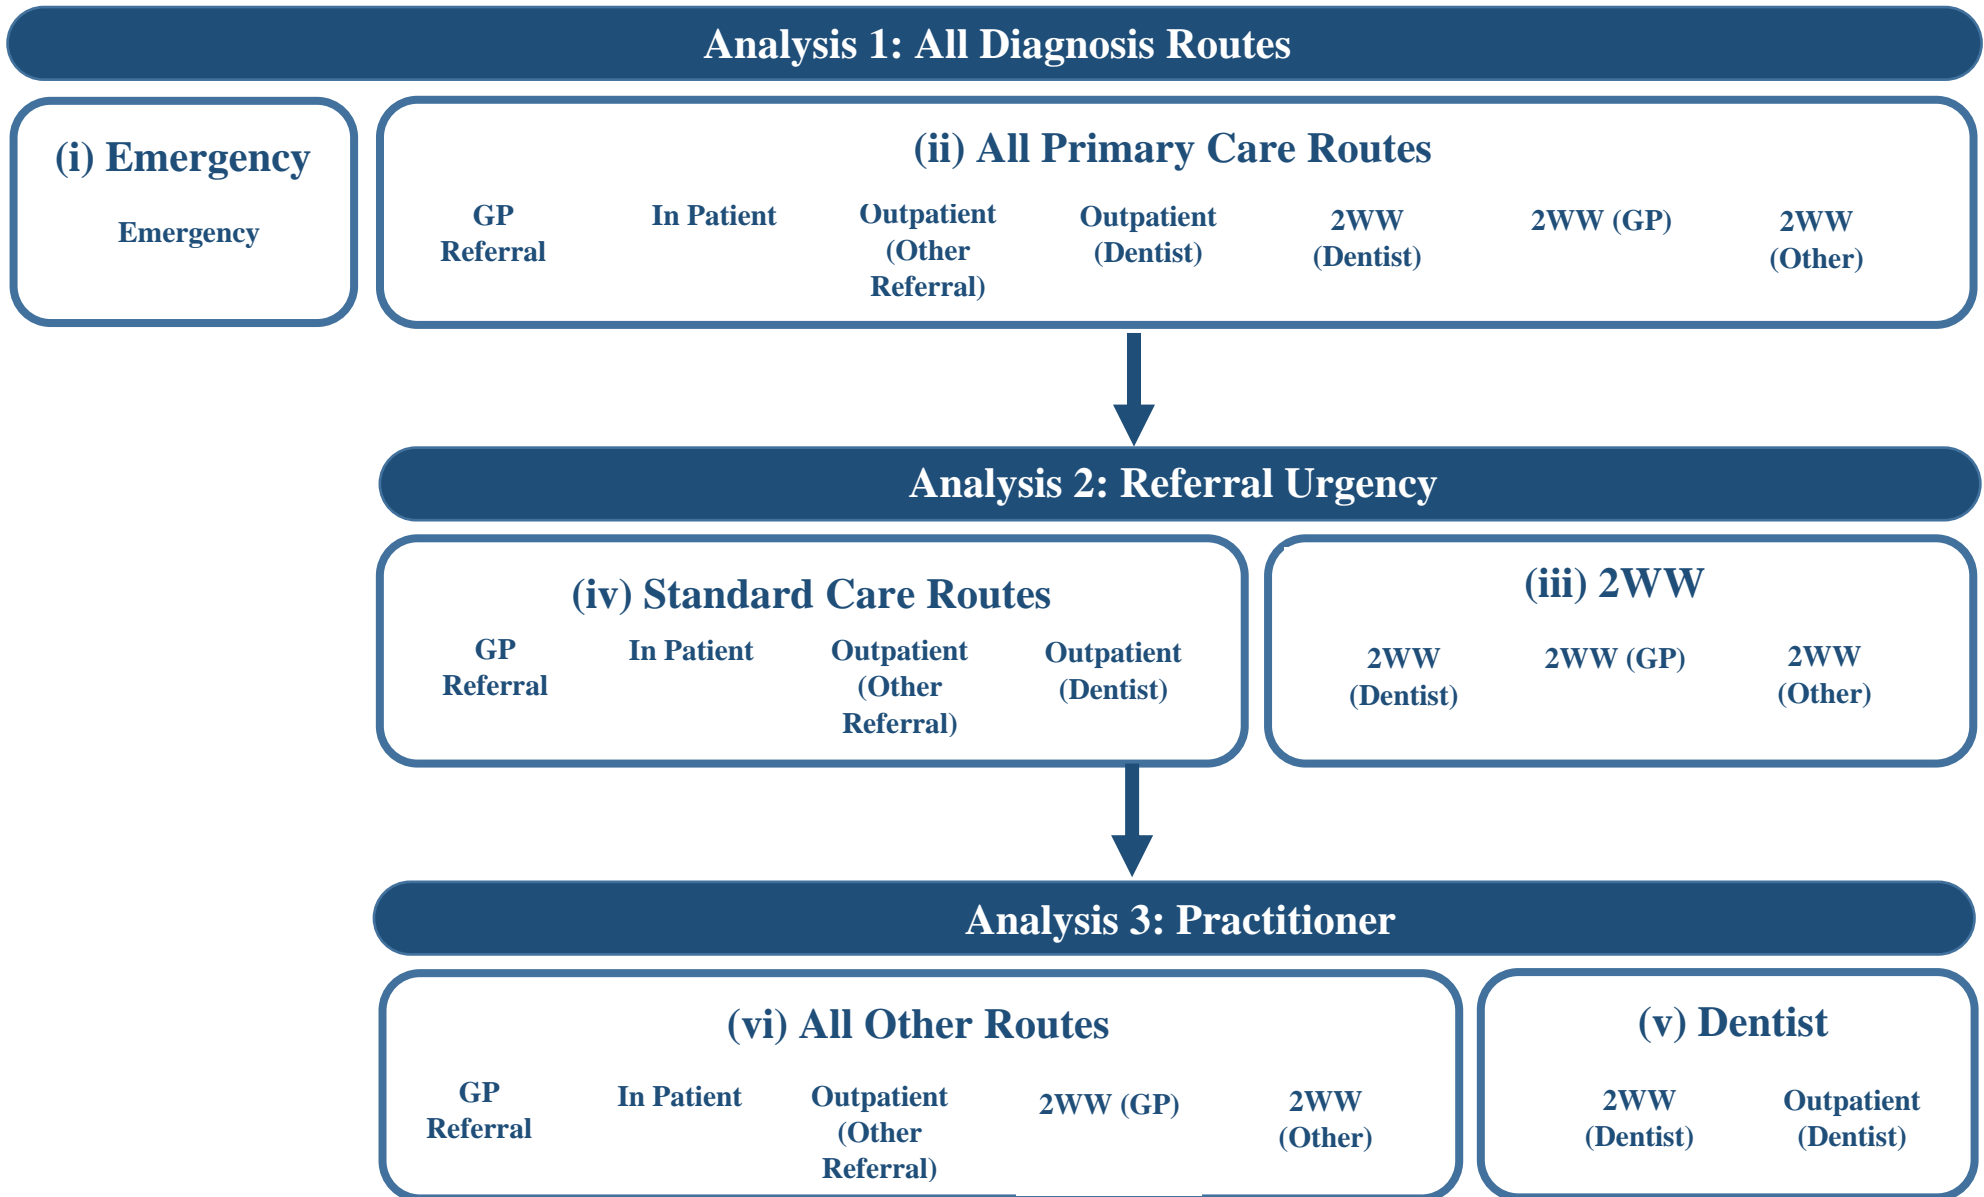

**Supplementary Table S1.** Demographic and clinical characteristics of all individual HNC diagnosis routes during 2006-2014.

| Analysis 1: All Diagnosis Routes |               | Emergency       | All Primary Care Routes |               |                              |                         |                  |                   |                 |
|----------------------------------|---------------|-----------------|-------------------------|---------------|------------------------------|-------------------------|------------------|-------------------|-----------------|
| Analysis 2: Referral Urgency     |               |                 | Standard Care Routes    |               |                              |                         | 2WW              |                   |                 |
| Analysis 3: Practitioner         |               |                 | All Other Routes        |               |                              | Dentist                 |                  | All Other Routes  |                 |
| Overall                          |               | Emergency       | GP Referral             | Inpatient     | Outpatient<br>Other Referral | Outpatient<br>(Dentist) | 2WW<br>(Dentist) | 2WW<br>(GP)       | 2WW<br>(Other)  |
| (n=66,411; 100%)                 |               | (n=5,676; 8.5%) | (n=21,803; 32.8%)       | (n=746; 1.1%) | (n=6,733; 10.1%)             | (n=5,305; 8.0%)         | (n=1,267; 1.9%)  | (n=22,741; 34.2%) | (n=2,140; 3.2%) |
| <b>Age at Diagnosis</b>          |               |                 |                         |               |                              |                         |                  |                   |                 |
| 20-54 years                      | 15,259 (23.0) | 1,061 (18.7)    | 5,288 (24.3)            | 178 (23.9)    | 1,543 (22.9)                 | 1,206 (22.7)            | 270 (21.3)       | 5,234 (23.0)      | 479 (22.4)      |
| 55-64 years                      | 19,459 (29.3) | 1,383 (24.4)    | 6,137 (28.1)            | 237 (31.8)    | 1,847 (27.4)                 | 1,440 (27.1)            | 344 (27.1)       | 7,378 (32.4)      | 693 (32.4)      |
| 65-79 years                      | 23,092 (34.8) | 2,006 (35.3)    | 7,586 (34.8)            | 243 (32.6)    | 2,460 (36.5)                 | 1,909 (36.0)            | 439 (34.6)       | 7,711 (33.9)      | 738 (34.5)      |
| 80+ years                        | 8,601 (13.0)  | 1,226 (21.6)    | 2,792 (12.8)            | 88 (11.8)     | 883 (13.1)                   | 750 (14.1)              | 214 (16.9)       | 2,418 (10.6)      | 230 (10.7)      |
| <b>Sex</b>                       |               |                 |                         |               |                              |                         |                  |                   |                 |
| Male                             | 46,241 (69.6) | 4,028 (71.0)    | 15,050 (69.0)           | 526 (70.5)    | 4,568 (67.8)                 | 2,863 (54.0)            | 773 (61.0)       | 16,860 (74.1)     | 1,573 (73.5)    |
| Female                           | 20,170 (30.4) | 1,648 (29.0)    | 6,753 (31.0)            | 220 (29.5)    | 2,165 (32.2)                 | 2,442 (46.0)            | 494 (39.0)       | 5,881 (25.9)      | 567 (26.5)      |
| <b>Cancer Site</b>               |               |                 |                         |               |                              |                         |                  |                   |                 |
| Oral Cavity <sup>1</sup>         | 22,620 (34.1) | 1,316 (23.2)    | 5,831 (26.7)            | 204 (27.3)    | 2,284 (33.9)                 | 4,523 (85.3)            | 1,106 (87.3)     | 6,802 (29.9)      | 554 (25.9)      |
| Oropharynx                       | 15,128 (22.8) | 1,024 (18.0)    | 4,613 (21.2)            | 177 (23.7)    | 1,310 (19.5)                 | 351 (6.6)               | 105 (8.3)        | 6,917 (30.4)      | 631 (29.5)      |
| Larynx                           | 15,885 (23.9) | 1,686 (29.7)    | 6,228 (28.6)            | 189 (25.3)    | 1,593 (23.7)                 | 37 (0.7)                | 6 (0.5)          | 5,631 (24.8)      | 515 (24.1)      |
| Other <sup>2</sup>               | 12,778 (19.2) | 1,650 (29.1)    | 5,131 (23.5)            | 176 (23.6)    | 1,546 (23.0)                 | 394 (7.4)               | 50 (3.9)         | 3,391 (14.9)      | 440 (20.6)      |
| <b>Deprivation Category</b>      |               |                 |                         |               |                              |                         |                  |                   |                 |
| IMD 1 (Least Deprived)           | 10,417 (15.7) | 656 (11.6)      | 3,438 (15.8)            | 187 (25.1)    | 1,294 (19.2)                 | 1,030 (19.4)            | 239 (18.9)       | 3,279 (14.4)      | 294 (13.7)      |
| IMD 2                            | 12,260 (18.4) | 808 (14.2)      | 4,147 (19.0)            | 158 (21.2)    | 1,292 (19.2)                 | 1,117 (21.1)            | 234 (18.5)       | 4,137 (18.2)      | 367 (17.1)      |
| IMD 3                            | 13,245 (19.9) | 1,062 (18.7)    | 4,431 (20.3)            | 156 (20.9)    | 1,260 (18.7)                 | 1,094 (20.6)            | 260 (20.5)       | 4,537 (20.0)      | 445 (20.8)      |
| IMD 4                            | 14,217 (21.4) | 1,319 (23.2)    | 4,731 (21.7)            | 129 (17.3)    | 1,343 (19.9)                 | 1,046 (19.7)            | 251 (19.8)       | 4,934 (21.7)      | 464 (21.7)      |
| IMD 5 (Most Deprived)            | 16,272 (24.5) | 1,831 (32.3)    | 5,056 (23.2)            | 116 (15.5)    | 1,544 (22.9)                 | 1,018 (19.2)            | 283 (22.3)       | 5,854 (25.7)      | 570 (26.6)      |
| <b>Period of Diagnosis</b>       |               |                 |                         |               |                              |                         |                  |                   |                 |
| 2006-2008                        | 19,623 (29.5) | 1,875 (33.0)    | 7,193 (33.0)            | 384 (51.5)    | 2,312 (34.3)                 | 1,467 (27.7)            | 240 (18.9)       | 5,588 (24.6)      | 564 (26.4)      |
| 2009-2011                        | 22,206 (33.4) | 1,850 (32.6)    | 7,452 (28.1)            | 175 (23.5)    | 2,399 (35.6)                 | 1,836 (34.6)            | 366 (28.9)       | 7,447 (32.7)      | 681 (31.8)      |
| 2012-2014                        | 24,582 (37.0) | 1,951 (34.4)    | 7,158 (34.8)            | 187 (25.1)    | 2,022 (30.0)                 | 2,002 (37.7)            | 661 (52.2)       | 9,706 (42.7)      | 895 (41.8)      |

Supplementary Table S1 Continued

| Analysis 1: All Diagnosis Routes |               | Emergency       | All Primary Care Routes |               |                              |                         |                  |                   |                  |
|----------------------------------|---------------|-----------------|-------------------------|---------------|------------------------------|-------------------------|------------------|-------------------|------------------|
| Analysis 2: Referral Urgency     |               |                 | Standard Care Routes    |               |                              |                         | 2WW              |                   |                  |
| Analysis 3: Practitioner         |               |                 | All Other Routes        |               |                              | Dentist                 |                  | All Other Routes  |                  |
| Overall                          |               | Emergency       | GP Referral             | Inpatient     | Outpatient<br>Other Referral | Outpatient<br>(Dentist) | 2WW<br>(Dentist) | 2WW<br>(GP)       | 2WW<br>(Other)   |
| (n=66,411; 100%)                 |               | (n=5,676; 8.5%) | (n=21,803; 32.8%)       | (n=746; 1.1%) | (n=6,733; 10.1%)             | (n=5,305; 8.0%)         | (n=1,267; 1.9%)  | (n=22,741; 34.2%) | (n=2,140); 3.2%) |
| <b>Ethnicity</b>                 |               |                 |                         |               |                              |                         |                  |                   |                  |
| White                            | 53,919 (81.2) | 4,325 (76.0)    | 17,267 (79.2)           | 577 (77.3)    | 5,407 (80.3)                 | 4,151 (78.2)            | 1,034 (81.6)     | 19,338 (85.0)     | 1,820 (85.0)     |
| Non-White <sup>3</sup>           | 3,032 (4.6)   | 318 (5.6)       | 1,130 (5.2)             | 30 (4.0)      | 375 (5.6)                    | 336 (6.3)               | 71 (5.6)         | 694 (3.1)         | 78 (3.6)         |
| Unknown <sup>4</sup>             | 9,460 (14.2)  | 1,033 (18.2)    | 3,406 (15.6)            | 139 (18.6)    | 951 (14.1)                   | 818 (15.4)              | 162 (12.8)       | 2,709 (11.9)      | 242 (11.3)       |
| <b>Urban/Rural Category</b>      |               |                 |                         |               |                              |                         |                  |                   |                  |
| Urban                            | 54,704 (82.4) | 4,889 (86.1)    | 17,913 (82.2)           | 593 (79.5)    | 5,569 (82.7)                 | 4,262 (80.3)            | 1,023 (80.7)     | 18,628 (81.9)     | 1,827 (85.4)     |
| Rural                            | 11,707 (17.6) | 787 (14.0)      | 3,890 (17.8)            | 153 (20.5)    | 1,164 (17.3)                 | 1,043 (19.7)            | 244 (19.3)       | 4,113 (18.1)      | 313 (14.6)       |
| <b>Stage</b>                     |               |                 |                         |               |                              |                         |                  |                   |                  |
| I                                | 5,301 (8.0)   | 105 (1.8)       | 1,918 (8.8)             | 25 (3.4)      | 480 (7.1)                    | 738 (13.9)              | 166 (13.1)       | 1,757 (7.7)       | 112 (5.2)        |
| II                               | 3,276 (4.9)   | 115 (2.0)       | 1,063 (4.9)             | 37 (5.0)      | 298 (4.4)                    | 268 (5.1)               | 93 (7.3)         | 1,300 (5.7)       | 102 (4.8)        |
| III                              | 3,526 (5.3)   | 214 (3.8)       | 1,087 (5.0)             | 19 (2.5)      | 271 (4.0)                    | 202 (3.8)               | 71 (5.6)         | 1,537 (6.8)       | 125 (5.8)        |
| IV                               | 13,043 (19.6) | 1,235 (21.8)    | 3,312 (15.2)            | 96 (12.9)     | 1,008 (15.0)                 | 925 (17.4)              | 350 (27.6)       | 5,600 (24.6)      | 517 (24.2)       |
| Other <sup>5</sup>               | 41,265 (62.1) | 4,007 (70.6)    | 14,423 (66.2)           | 569 (76.3)    | 4,676 (69.4)                 | 3,172 (59.8)            | 587 (46.3)       | 12,547 (55.2)     | 1,284 (60.0)     |
| <b>Grade</b>                     |               |                 |                         |               |                              |                         |                  |                   |                  |
| 1 (Low)                          | 5,589 (8.4)   | 323 (5.7)       | 1,926 (8.8)             | 49 (6.6)      | 568 (8.4)                    | 802 (15.1)              | 136 (10.7)       | 1,649 (7.3)       | 136 (6.4)        |
| 2                                | 25,074 (37.8) | 1,770 (31.2)    | 7,728 (35.4)            | 265 (35.5)    | 2,175 (32.3)                 | 2,382 (44.9)            | 663 (52.3)       | 9,281 (40.8)      | 810 (37.9)       |
| 3                                | 17,851 (26.9) | 1,424 (25.1)    | 5,551 (25.5)            | 207 (27.7)    | 1,708 (25.3)                 | 854 (16.1)              | 289 (22.8)       | 7,101 (31.2)      | 717 (33.5)       |
| 4 (High)                         | 603 (0.9)     | 66 (1.2)        | 237 (1.1)               | 8 (1.1)       | 69 (1.0)                     | 14 (0.3)                | 5 (0.4)          | 175 (0.8)         | 29 (1.4)         |
| Unknown <sup>6</sup>             | 17,294 (26.0) | 2,093 (36.9)    | 6,361 (29.2)            | 217 (29.1)    | 2,213 (32.9)                 | 1,253 (23.6)            | 174 (13.7)       | 4,535 (19.9)      | 448 (20.9)       |
| <b>Comorbidities<sup>7</sup></b> |               |                 |                         |               |                              |                         |                  |                   |                  |
| None                             | 48,572 (73.1) | 3,586 (63.2)    | 16,074 (73.7)           | 599 (80.3)    | 4,649 (69.0)                 | 3,976 (74.9)            | 915 (72.2)       | 17,175 (75.5)     | 1,598 (74.7)     |
| 1                                | 8,690 (13.1)  | 878 (15.5)      | 2,887 (13.2)            | 70 (9.4)      | 895 (13.3)                   | 618 (11.6)              | 184 (14.5)       | 2,885 (12.7)      | 273 (12.8)       |
| 2+                               | 9,149 (13.8)  | 1,212 (21.4)    | 2,842 (13.0)            | 77 (10.3)     | 1,189 (17.7)                 | 711 (13.4)              | 168 (13.3)       | 2,681 (11.8)      | 269 (12.6)       |

<sup>1</sup>Includes palate; <sup>2</sup>Other cancer site refers to nasopharynx, hypopharynx, salivary glands, other sites and non-specific sites; <sup>3</sup>Non-White refers to other ethnic groups; <sup>4</sup>Unknown ethnicity refers to missing and unknown ethnicity; <sup>5</sup>Other stage refers to missing and unstageable tumours; <sup>6</sup>Unknown grade refers to unknown and missing tumour grades; <sup>7</sup>Measured using the Charlson Comorbidity Index; Abbreviations: GP: General practitioner; HNC: Head and neck cancer; IMD: Index of multiple deprivation; 2WW: Two week wait.
